# Supplementary material
Source: PubMed Central journal article supplement (PMC3291895)
Supplement: NIHMS266868-supplement-1.pdf [file NIHMS266868-supplement-1.pdf]

## SUPPLEMENTAL MATERIALS

### SUPPLEMENTAL METHODS

#### Experimental mice

Conventional PPAR $\delta$  knock-out mice are difficult to generate due to frequent embryonic lethality<sup>1,2</sup>. In this study, vascular smooth muscle cell (VSMC)-selective PPAR $\delta$  knockout mice were generated by breeding our SM22 $\alpha$ -Cre knock-in homozygous mice (SM22 $\alpha$ <sup>Cre/+</sup>)<sup>3</sup> with PPAR $\delta$ -floxed homozygous mice (PPAR $\delta$ <sup>flox/flox</sup>)<sup>1</sup>. Both SM22 $\alpha$ <sup>Cre/+</sup> and PPAR $\delta$ <sup>flox/flox</sup> mice are derived from a C57BL/6J background. Offspring were genotyped by PCR as DNA was obtained from tail-snip biopsies using transgene-specific oligonucleotide primers for SM22 $\alpha$ -Cre and PPAR $\delta$ -floxP<sup>1,3</sup>. Two groups of mice were selected for this study: 1) VSMC-selective PPAR $\delta$  conditional knockout mice (SMP $\delta$  cKO) with a genotype of SM22 $\alpha$ -Cre-knock-in heterozygous and PPAR $\delta$ -floxed homozygous (SM22 $\alpha$ <sup>Cre/+</sup>/PPAR $\delta$ <sup>flox/flox</sup>), and 2) littermate control mice (LC) with a genotype of SM22 $\alpha$  wild-type and PPAR $\delta$ -floxed homozygous (SM22 $\alpha$ <sup>+/+</sup>/PPAR $\delta$ <sup>flox/flox</sup>, PPAR $\delta$ -floxed control). Another line of LC could be mice with a genotype of SM22 $\alpha$ -Cre heterozygous and PPAR $\delta$  wild-type (SM22 $\alpha$ <sup>Cre/+</sup>/PPAR $\delta$ <sup>+/+</sup>, SM22 $\alpha$ -Cre control). We chose PPAR $\delta$ -floxed mice as the experimental LC in this study since these two genotyped mice of LC show the same phenotype. Generally, VSMC-selective PPAR $\delta$  conditional knockout mice showed normal development and fertility. All experiments were conducted in male, 8-10 week-old mice, and age- and weight-matched littermates were housed in a temperature-controlled animal facility with a 12-h:12-h light-dark cycle and free access to water and rodent chow. The animal study protocol was approved by the University of Michigan Animal Care and Use Committee.

#### Mouse model of transient focal cerebral ischemia

Focal cerebral ischemia was induced in mice by intraluminal middle cerebral artery occlusion (MCAO) using a nylon monofilament suture as described previously<sup>4-6</sup>. Briefly, mice were anesthetized with ketamine (100mg/kg) and xylazine (10 mg/kg). After a midline skin incision, the left common carotid artery was exposed and then its branches were electrocoagulated. A 2-cm length of 6-0 rounded tip nylon suture was gently advanced from the external carotid artery up to the internal carotid artery until regional cerebral blood flow (rCBF) was reduced to less than 16% of baseline. After 30 minutes of proximal MCA occlusion, blood flow was restored by removing the suture. Changes in cerebral blood flow (CBF) at the surface of the cortex were recorded using a laser-Doppler flowmetry monitor (BPM2 System, Vasamedic, St. Paul, MN). Sham control animals were subjected to similar operations to expose the carotid arteries without occlusion of the middle cerebral artery. After 30 minutes of MCAO, the mice were allowed to recover for 24 hours. Arterial blood gases, mean arterial pressure, and heart rate were also monitored in selected animals 30 min before, during, and 30 min after MCAO. The rectal temperature was controlled at  $37.0 \pm 0.5^{\circ}\text{C}$  during surgery with a feedback-regulated heating pad (Harvard, Holliston, MA). After the ischemic insult, mice were kept in an air-ventilated incubator at  $24.0 \pm 0.5^{\circ}\text{C}$ . The animals were sacrificed at 24 h of reperfusion, and the brains were quickly removed for biochemical assays as well as infarct determination.

#### Inhibition of MMP-9 levels in mouse brain by lentivirus-mediated infection

We employed a lentivirus-mediated RNA interference approach to achieve the inhibition of MMP-9 levels in the brain. In brief, mice were anesthetized and fixed in a stereotaxic apparatus. A burr hole was drilled in the pericranium 2.5 mm lateral to the sagittal suture and 0.94 mm posterior to the coronal suture. A 10- $\mu\text{l}$  Hamilton syringe was stereotactically inserted into the lateral ventricle and caudate approximately 3.0 mm under the cortex. Four-microliter lentiviral

suspensions (Lenti-shMMP-9, Lenti-GFP, custom-made in Sigma, St Louis, MO) containing  $5 \times 10^{10}$  genome copies of each virus were injected into the left ventricle and caudate putamen at a rate of 0.2  $\mu$ l per minute based on a prior publication<sup>7</sup>. The needle was withdrawn after 15 minutes of injection. Control animals received the same amount of PBS injection. The lentivirus-infected mice survived for 4 weeks before transient focal cerebral ischemia was induced in the left MCA territory for 30 min and all mice were sacrificed 24 h after MCA occlusion.

Mouse brains were removed and then subjected to 2% 2,3,5-*triphenyltetrazolium chloride* (TTC) staining for measurement of infarct volume, gelatin-based zymography for MMP activity, and quantitative analysis of Evans Blue extravasation for BBB permeability.

#### Measurement of infarct volume and neurological deficit

Infarct volume was measured using 2% TTC staining as described previously<sup>5, 6, 8</sup>. Mouse brains were removed at 24 h after MCAO, and sliced into 8 coronal sections (1 mm thick) by a mouse brain matrix. The slices were stained with 2% TTC for 15 min at 37°C, scanned and the infarct area was estimated by Metamorph software. The infarct volume was calculated using a derived formula<sup>9</sup> in which infarct volume as a percentage of the contralateral hemisphere was calculated as  $100 \times (\text{contralateral hemisphere volume} - \text{non-infarct ipsilateral hemisphere volume}) / \text{contralateral hemisphere volume}$ .

Following cerebral ischemia, mice were also tested for neurological deficits and scored on a 5-point scale<sup>5, 6, 8</sup>: 0, no observable neurological deficits (normal); 1, failure to extend right forepaw (mild); 2, circling to the contralateral side (moderate); 3, falling to the right (severe); 4, mice could not walk spontaneously; depressed level of consciousness (very severe).

### Quantitation of Evans Blue extravasation

For analysis of cerebrovascular permeability after MCAO, mice were injected with 100  $\mu$ l of 4% Evans Blue (EB) (Sigma-Aldrich) 23 h after MCAO. One hour later, animals were perfused with PBS and the brains were removed and separated into hemispheres ipsilateral and contralateral to the MCAO. Each hemisphere was then homogenized in N,N-dimethylformamide (Sigma-Aldrich) and centrifuged for 45 min at 25,000 rcf. The supernatants were collected and quantitation of EB extravasation was performed as described<sup>5, 10</sup>. Briefly, EB levels in each hemisphere were determined from the formula:  $(A_{620nm} - ((A_{500nm} + A_{740nm}) / 2)) / \text{mg wet weight}$ . Background EB levels in the non-ischemic hemisphere were subtracted from the ischemic hemisphere ipsilateral to the MCAO.

### Isolation of cerebral vessels

Cerebral vessels were isolated using a previously described method with some modifications<sup>11</sup>. Briefly, mice were sacrificed by decapitation under anesthesia. The brains were immediately removed from the skull and immersed in ice-cold buffer A (103 mM NaCl, 4.7mM KCl, 2.5 mM CaCl<sub>2</sub>, 1.2 mM KH<sub>2</sub>PO<sub>4</sub>, 1.2 mM MgSO<sub>4</sub>, 15 mM Hepes, pH 7.4). The brain was homogenized in a 5-fold volume excess of buffer B (103 mM NaCl, 4.7mM KCl, 2.5 mM CaCl<sub>2</sub>, 1.2 mM KH<sub>2</sub>PO<sub>4</sub>, 1.2 mM MgSO<sub>4</sub>, 15 mM Hepes, 25 mM HCO<sub>3</sub>, 10 mM glucose, 1mM sodium pyruvate, and 1 g/100 ml dextran pH 7.4) with a Teflon homogenizer. The homogenate was suspended in an equal volume of 25% BSA and was centrifuged at 5,800 x g at 4 °C for 30 min. The vessel pellet was recovered in buffer B and then spun at 500 x g for 5 min. The final vessel pellet was stored at -80 °C until various biochemical assays were performed.

### Gelatin-substrate zymography:

Animals were perfused with saline, and then the cerebral cortex and hippocampus were removed and snap-frozen at  $-80^{\circ}\text{C}$ . Brain samples were then homogenized in 500  $\mu\text{l}$  lysis buffer (50 mM Tris-HCl, pH 7.6, 150 mM NaCl, 5 mM  $\text{CaCl}_2$ , 0.05% BRIJ-35, 0.02%  $\text{NaN}_3$ ) and the supernatant was collected after centrifugation. The brain supernatant or 1 ml of conditioned medium from VSMC culture after various treatments was incubated with 50  $\mu\text{l}$  of gelatin-Sepharose 4B (Pharmacia Biotech, Uppsala, Sweden) for 1 h with constant shaking. After centrifugation, the gelatin-sepharose pellet was rinsed with 500  $\mu\text{l}$  lysis buffer and the solution was centrifuged again. The pellet was then incubated for 30 min with 50  $\mu\text{l}$  of elution buffer consisting of lysis buffer plus 10% dimethylsulfoxide (DMSO). 25  $\mu\text{l}$  of eluted sample from a specific mouse brain region was mixed with 25  $\mu\text{l}$  2x non-reducing sample buffer (0.125 M Tris-HCl, 20% glycerol, 4% SDS, 0.003% bromphenol blue, pH 6.8), loaded onto 7.5% SDS-PAGE containing 0.1% gelatin, and electrophoresed at 180 V. The gel was incubated for 20 h at  $37^{\circ}\text{C}$  in buffer containing 21 mM Tris-HCl, 10 mM  $\text{CaCl}_2$  and 0.04%  $\text{NaN}_3$ , pH 7.6 after washing twice in 2.5% Triton X-100 for 20 min. After incubation, the gel was stained for 1 h with 0.1% Coomassie blue (diluted with 40% methanol and 10% HAc) and destained until clear proteolytic bands appear on a contrasting blue background<sup>12, 13</sup>.

### Cell cultures

Aortic smooth muscle cells were prepared from wild-type mice as previously described<sup>14, 15</sup>. The cultured cells were maintained in DMEM/F-12 containing 10% FBS, 100 units/ml penicillin, 100  $\mu\text{g}/\text{ml}$  streptomycin, and 200 mM L-glutamine. VSMCs (4-10<sup>th</sup> passage) uniformly positive for  $\alpha$ -smooth muscle actin immunohistochemical staining (>95% vascular smooth muscle cell purity), were grown to 85-95% confluence before OGD exposure. In some experiments, a specific PPAR $\delta$  agonist, GW 501516, at a dose of  $1\mu\text{M}$  was added 12 h prior to OGD onset.

### Oxygen-glucose deprivation (OGD)

To mimic ischemia-like conditions *in vitro*, mouse VSMC cultures were exposed to OGD for various times<sup>5, 6, 16</sup>. Briefly, confluent VSMCs were transferred into a temperature-controlled ( $37 \pm 1^\circ\text{C}$ ) anaerobic chamber (Forma Scientific, Marietta, OH) containing a gas mixture composed of 5% CO<sub>2</sub>, and 95% N<sub>2</sub>. The culture medium was replaced with deoxygenated glucose-free Hanks' Balanced Salt Solution and cells were maintained in the hypoxic chamber for 0, 4 and 24 h. Control VSMC cultures were not exposed to OGD.

### Real-time PCR

A quantitative real-time reverse transcriptase polymerase chain reaction (RT-PCR) was carried out with a Bio-Rad thermocycler and an SYBR green kit (Bio-Rad, Hercules, CA) according to the manufacturer's recommendations<sup>5, 6, 11</sup>. Specific primers used for the reaction are as described in Supplemental Table I. The relative expression of target mRNAs was normalized by 18S RNA levels.

### Western blot analysis

Total protein was isolated from the cerebral cortex, cerebral vessels, aortas or VSMC cultures as described previously<sup>5, 6, 11, 16, 17</sup>. Samples (20-40  $\mu\text{g}$  of protein) were electrophoresed onto 10-15% SDS/polyacrylamide gels (SDS/PAGE) and transferred to PVDF membranes. The membranes were blocked in TBST buffer containing 20 mM Tris-HCl, 5% nonfat milk, 150 mM NaCl, and 0.05% Tween-20 (pH 7.5) for 1 h at room temperature. Thereafter, the blots were incubated respectively with a primary rabbit anti-PPAR $\delta$  antibody (1:200; Santa Cruz, CA), or mouse anti-actin antiserum (1:500; Santa Cruz, CA) for 1-2 h at room temperature. The

membranes were washed with TBST 3 times at 10 min intervals, incubated with the secondary antibody (1:5000; anti-rabbit, or anti-mouse IgG conjugated with alkaline phosphatase (Promega, Madison, WI) at RT for 1 h, then washed three times each at 10 min intervals with TBST and two times each for 10 min with TBS. The color reaction was developed by the Blot AP System (Promega).

#### Adenovirus-mediated gain-of-PPAR $\delta$ function in VSMCs

We employed a previously described method that facilitates adenoviral vector construction<sup>18</sup>. Briefly, a ~1.4 kb segment of a mouse PPAR $\delta$  gene coding sequence was amplified by RT-PCR from mouse total RNA and then cloned into pCMVTrack, an adenovirus shuttle vector. This plasmid was co-transformed with AdEasy, a backbone of the adenovirus, into E.coli. The clone from *in vivo* recombination was isolated, digested and used for transfection in the packaging cell line, HEK 293. Transfected cells were monitored for GFP expression and collected 7-10 days later by scraping and pelleting along with any floating cells in the culture. After amplification in HEK 293 cells, viruses were purified by a CsCl gradient; final yields were generally 10<sup>11</sup> to 10<sup>12</sup> plaque-forming units. The generated adenovirus was used to infect VSMCs for 48-72 h, and the expression levels of the transgene were determined by immunoblotting. Comparisons were made using control adenoviral vectors with empty inserts or green fluorescent protein (GFP)<sup>5</sup>.

#### Retrovirus-mediated loss-of-PPAR $\delta$ function in VSMCs

A retrovirus vector carrying shRNA targeting the mouse PPAR $\delta$  gene (pRS-shPPAR $\delta$ ) or a non-effective 29-mer shGFP cassette (pRS-shGFP) was purchased directly from the Origene company (Origene, Rockville MD). For production of a high-titer retrovirus vector expressing PPAR $\delta$  small hairpin RNA, the recombinant vector was transfected into EcoPack-293 cells and

incubated at 32°C for 2 d. The supernatant fraction containing the viral vector was collected to infect VSMCs for 3 h. The supernatant fraction was then removed and replaced with normal growth medium for 48-72 h. Infected populations exhibiting between 70-90% green fluorescent cells were used for further experimentation <sup>11</sup>.

#### Chromatin Immunoprecipitation (ChIP) Assay

Mouse VSMCs were infected with an adenovirus carrying mouse PPAR $\delta$  or GFP. After 48 h, cells were fixed and a ChIP assay was performed by using the EZ-ChIP assay kit from Upstate Biotechnology (Lake Placid, NY). The size of the sonicated DNA fragments subjected to immunoprecipitation was 0.5-1 kb as determined by ethidium bromide gel electrophoresis. Purified chromatin was immunoprecipitated using an anti-PPAR $\delta$  antibody (Santa Cruz). Eluted DNA fragments were purified to serve as templates for PCR amplification. The input fraction corresponded to 2% of the chromatin solution before immunoprecipitation. By using bioinformatics software to analyze the mouse MMP-9 promoter, a potential PPAR $\delta$  binding site (PPRE) was identified, which is located -944/-921 bp upstream of the transcription start site. Primers used to amplify the area containing this PPAR $\delta$  binding site are: Forward primer 5'-aagcacatgaaggtctgggcacac-3' and reverse primer 5'-tgacctggatggggcaaacacc-3', resulting in a 236 bp fragment. To monitor the specificity of each assay, ChIP experiments with normal IgG immunoprecipitates served as background control <sup>5</sup>. To further confirm the specificity of the ChIP assay, a nonspecific region distal to the PPRE site (at nucleotides -3613 to -3282 of the MMP-9 promoter) was also amplified by PCR using the following primers: Forward primer 5'-aagtgttggtgctgtaagttgaa-3' and reverse primer 5'-cctgggtgagtgggaagagaaga-3'.

#### Plasmid constructs and luciferase assays



A 1,309 bp segment from the promoter region (-1253/+55) of the mouse MMP-9 gene (MMP-9 PPRE WT) was amplified by PCR from mouse genomic DNA and then cloned into the *Kpn I/Xho I* site of the pGL 4.10 Luciferase vector (Promega). The following primer sets were used to generate specific fragments: Forward, 5'-cggggtaccaaggtggttgggaaatgacgaggtg-3'; reverse, 5'-ccgctcgagtgagccgaaagccaggagagc-3'. According to bioinformatics analysis, a potential PPAR binding site (PPRE) at locations of -944/-921 bp was identified in this promoter fragment. Thus, we also generated a mutant MMP-9 promoter construct (MMP-9 PPRE mut.) with substitutions of 4 bp respectively from the PPRE site of perfect complementarity by using the QuikChange XL Site-Directed Mutagenesis Kit (Stratagene). The sequence of the mutant PPRE MMP-9 promoter segment contained 5'-ctggaggAttGGAattGTCCatg-3' (the four underlined nucleotides are mutated). Wild-type and mutant inserts were confirmed by sequencing <sup>5</sup>.

MMP-9 promoter plasmids (MMP-9 PPRE WT or PPRE mut.) together with the *Renilla* luciferase control reporter vector (pRL-TK) were transfected into HEK 293 cells with lipofectamine 2000 (Invitrogen) for 4 h, then changed to normal growth medium for 48 h. HEK 293 cells were also co-infected with an adenovirus carrying mouse PPAR $\delta$  or GFP for 48 h. Promoter activity was examined using the Dual-Luciferase Assay Kit (Promega) with a TD-20/20 luminometer (Turner Designs). MMP-9 promoter-firefly luciferase activity was normalized to the TK promoter-*Renilla* luciferase activity <sup>5</sup>. In parallel experiments, either the specific PPAR $\delta$  agonist GW 501516 (1 $\mu$ M) or the specific PPAR $\delta$  antagonist GSK 0660 (1 $\mu$ M) <sup>19</sup>, was added 12 h prior to cell harvest for promoter activity assay.

### Statistical analysis

Quantitative data are expressed as mean  $\pm$  SD or SEM based on at least three independent experiments of triplicate samples. Differences among three or more groups were

statistically analyzed by one-way analysis of variance followed by Bonferroni's post hoc test. Comparisons between two experimental groups were based on a two-tailed t-test. A *p-value* less than 0.05 was considered significant.

## SUPPLEMENTAL REFERENCES

1. Barak Y, Liao D, He W, Ong ES, Nelson MC, Olefsky JM, Boland R, Evans RM. Effects of peroxisome proliferator-activated receptor delta on placentation, adiposity, and colorectal cancer. *Proc Natl Acad Sci U S A*. 2002;99:303-308.
2. Peters JM, Lee SS, Li W, Ward JM, Gavrilova O, Everett C, Reitman ML, Hudson LD, Gonzalez FJ. Growth, adipose, brain, and skin alterations resulting from targeted disruption of the mouse peroxisome proliferator-activated receptor beta(delta). *Mol Cell Biol*. 2000;20:5119-5128.
3. Zhang J, Zhong W, Cui T, Yang M, Hu X, Xu K, Xie C, Xue C, Gibbons GH, Liu C, Li L, Chen YE. Generation of an adult smooth muscle cell-targeted Cre recombinase mouse model. *Arterioscler Thromb Vasc Biol*. 2006;26:e23-24.
4. Yang GY, Zhao YJ, Davidson BL, Betz AL. Overexpression of interleukin-1 receptor antagonist in the mouse brain reduces ischemic brain injury. *Brain Res*. 1997;751:181-188.
5. Yin KJ, Deng Z, Hamblin M, Xiang Y, Huang H, Zhang J, Jiang X, Wang Y, Chen YE. Peroxisome proliferator-activated receptor delta regulation of miR-15a in ischemia-induced cerebral vascular endothelial injury. *J Neurosci*. 2010;30:6398-6408.
6. Yin KJ, Deng Z, Huang H, Hamblin M, Xie C, Zhang J, Chen YE. miR-497 regulates neuronal death in mouse brain after transient focal cerebral ischemia. *Neurobiol Dis*. 2010;38:17-26.
7. Shen F, Su H, Fan Y, Chen Y, Zhu Y, Liu W, Young WL, Yang GY. Adeno-associated viral-vector-mediated hypoxia-inducible vascular endothelial growth factor gene expression

- attenuates ischemic brain injury after focal cerebral ischemia in mice. *Stroke*. 2006;37:2601-2606.
8. Vemuganti R, Dempsey RJ, Bowen KK. Inhibition of intercellular adhesion molecule-1 protein expression by antisense oligonucleotides is neuroprotective after transient middle cerebral artery occlusion in rat. *Stroke*. 2004;35:179-184.
  9. Swanson RA, Morton MT, Tsao-Wu G, Savalos RA, Davidson C, Sharp FR. A semiautomated method for measuring brain infarct volume. *J Cereb Blood Flow Metab*. 1990;10:290-293.
  10. Su EJ, Fredriksson L, Geyer M, Folestad E, Cale J, Andrae J, Gao Y, Pietras K, Mann K, Yepes M, Strickland DK, Betsholtz C, Eriksson U, Lawrence DA. Activation of PDGF-CC by tissue plasminogen activator impairs blood-brain barrier integrity during ischemic stroke. *Nat Med*. 2008;14:731-737.
  11. Yin KJ, Hsu CY, Hu XY, Chen H, Chen SW, Xu J, Lee JM. Protein phosphatase 2A regulates bim expression via the Akt/FKHRL1 signaling pathway in amyloid-beta peptide-induced cerebrovascular endothelial cell death. *J Neurosci*. 2006;26:2290-2299.
  12. Zhang JW, Gottschall PE. Zymographic measurement of gelatinase activity in brain tissue after detergent extraction and affinity-support purification. *J Neurosci Methods*. 1997;76:15-20.
  13. Yin KJ, Cirrito JR, Yan P, Hu X, Xiao Q, Pan X, Bateman R, Song H, Hsu FF, Turk J, Xu J, Hsu CY, Mills JC, Holtzman DM, Lee JM. Matrix metalloproteinases expressed by astrocytes mediate extracellular amyloid-beta peptide catabolism. *J Neurosci*. 2006;26:10939-10948.
  14. Brock TA, Alexander RW, Ekstein LS, Atkinson WJ, Gimbrone MA, Jr. Angiotensin increases cytosolic free calcium in cultured vascular smooth muscle cells. *Hypertension*. 1985;7:1105-109.

15. Zhang J, Fu M, Zhu X, Xiao Y, Mou Y, Zheng H, Akinbami MA, Wang Q, Chen YE. Peroxisome proliferator-activated receptor delta is up-regulated during vascular lesion formation and promotes post-confluent cell proliferation in vascular smooth muscle cells. *J Biol Chem.* 2002;277:11505-11512.
16. Yin KJ, Chen SD, Lee JM, Xu J, Hsu CY. ATM gene regulates oxygen-glucose deprivation-induced nuclear factor-kappaB DNA-binding activity and downstream apoptotic cascade in mouse cerebrovascular endothelial cells. *Stroke.* 2002;33:2471-2477.
17. Yin KJ, Lee JM, Chen SD, Xu J, Hsu CY. Amyloid-beta induces Smac release via AP-1/Bim activation in cerebral endothelial cells. *J Neurosci.* 2002;22:9764-9770.
18. He TC, Zhou S, da Costa LT, Yu J, Kinzler KW, Vogelstein B. A simplified system for generating recombinant adenoviruses. *Proc Natl Acad Sci U S A.* 1998;95:2509-2514.
19. Shearer BG, Steger DJ, Way JM, Stanley TB, Lobe DC, Grillot DA, Iannone MA, Lazar MA, Willson TM, Billin AN. Identification and characterization of a selective peroxisome proliferator-activated receptor beta/delta (NR1C2) antagonist. *Molecular endocrinology Baltimore, Md.* 2008;22:523-529.

**SUPPLEMENTAL FIGURE LEGENDS**

**Supplementary Figure I: Identification of SMP $\delta$  cKO mice.** (A) Genomic PCR genotyping showed that VSMC-selective PPAR $\delta$  knockout (SMP $\delta$  cKO) mice and littermate controls (LC) were generated by crossing SM22 $\alpha$ -Cre knock-in mice with PPAR $\delta^{\text{flox/flox}}$  mice. (B) Western blot analysis showing PPAR $\delta$  expression in lysates from aortas, brains, and cerebral vessels of SMP $\delta$  cKO and LC mice. Cre-mediated recombination in VSMCs led to a lack of PPAR $\delta$  expression in the aortic SMC layer but not in the brains of SMP $\delta$  cKO mice. Also, a significant reduction of PPAR $\delta$  levels in the cerebral vessels of SMP $\delta$  cKO mice is evident. Results shown are representative of three separate experiments with similar results.

**Supplementary Figure II: Expression of pro-inflammatory genes in brains of SMP $\delta$  cKO after focal cerebral ischemia.** Quantitative PCR data shows that the expression of indicated cytokines was significantly increased in VSMC-selective PPAR $\delta$  knockout (SMP $\delta$  cKO) mice after transient MCAO and 24 h of reperfusion when compared with littermate control (LC) mice. \* P<0.05 vs LC group. Data are expressed as mean  $\pm$  SEM from three separate experiments in triplicate.

**Supplementary Figure III: Adenoviral-mediated PPAR $\delta$  gene transfer in mouse VSMCs.** (A) Fluorescence microscopic observation indicates a successful infection of the adenovirus carrying PPAR $\delta$  or GFP into mouse VSMCs. Scale bar, 50 $\mu$ m. (B) Upregulation of PPAR $\delta$  in mouse VSMCs after adenoviral-mediated gene transfer is confirmed by Western blotting. (C) Knockdown of PPAR $\delta$  in mouse VSMCs after retrovirus-mediated RNA interference is confirmed by Western blotting. Results shown are representative of three separate experiments with similar results.

**Supplementary Table I: The specific primers for real time PCR**

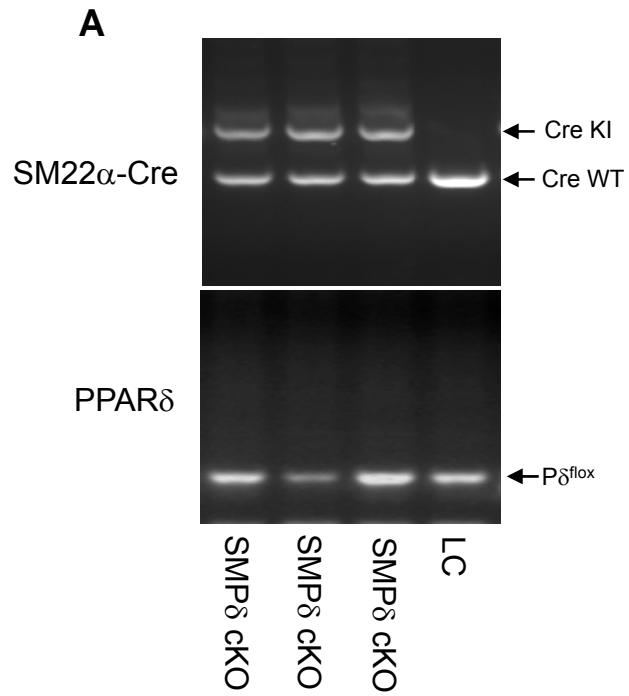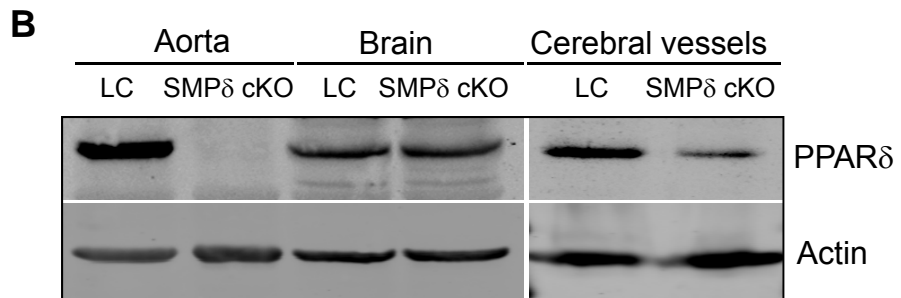

Supplemental Figure I

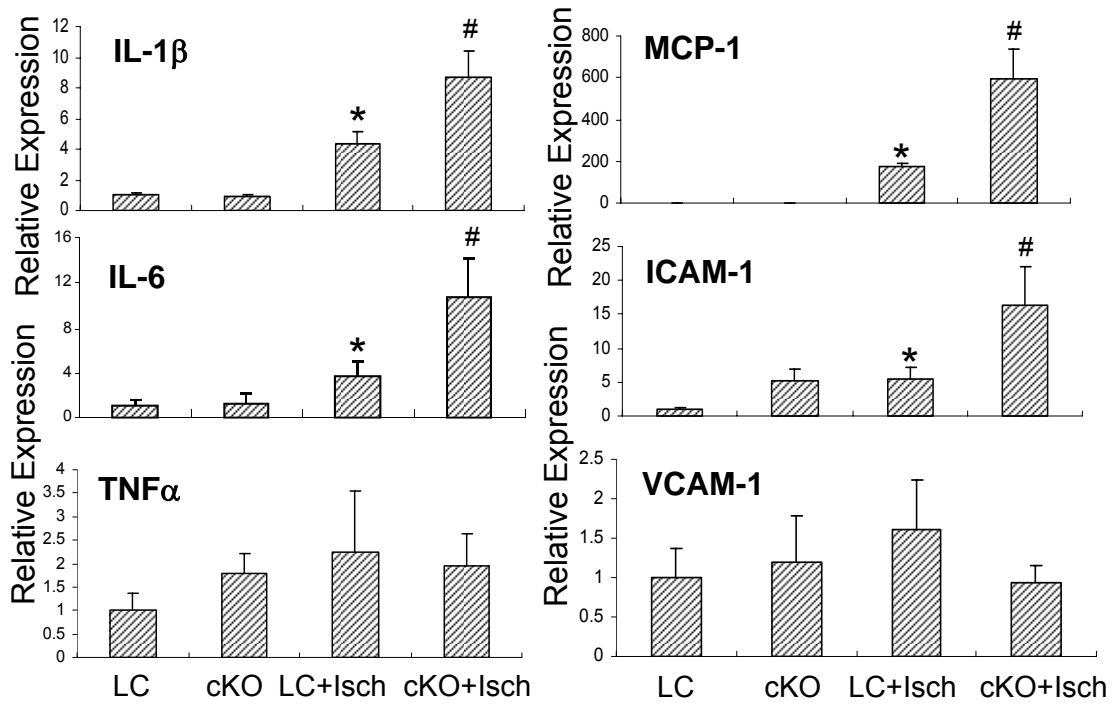

Supplemental Figure II

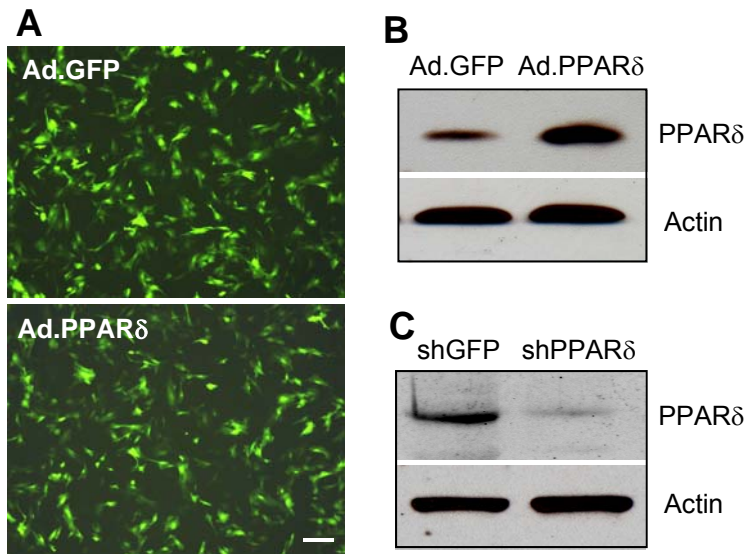

Supplemental Figure III



**Table I: PCR primers**

| <b>Gene</b>   | <b>Forward Primer</b>            | <b>Reverse Primer</b>          |
|---------------|----------------------------------|--------------------------------|
| PPAR $\delta$ | 5'-AGGCCCGGGAAGAGGAGAAAGAGG-3'   | 5'-CGCGTGGACCCCGTAGTGGA-3'     |
| IL-1 $\beta$  | 5'-AGGAGAACCAAGCAACGACAAAATAC-3' | 5'-TGGGAACTCTGCAGACTCAAAC-3'   |
| IL-6          | 5'-AGTTGCCTTCTTGGGACTGA-3'       | 5'-TCCACGATTTCCAGAGAAC-3'      |
| TNF $\alpha$  | 5'-CTCCTCACCCACACCGTCAGC-3'      | 5'-AACACCCATTCCCTTCACAGAGCA-3' |
| MCP-1         | 5'-GCACCAGCACCAGCCAACCTCTCACT-3' | 5'-CATTCTTCTTGGGGTCAGCACAG-3'  |
| ICAM-1        | 5'-TTCACACTGAATGCCAGCTC-3'       | 5'-GTCTGCTGAGACCCCTCTTG-3'     |
| VCAM-1        | 5'-ATTTTCTGGGGCAGGAAGTT-3'       | 5'-ACGTCAGAACAACCGAATCC-3'     |
| MMP-2         | 5'-GTCGCCCTAAAACAGACAA-3'        | 5'-GGTCTCGATGGTGTCTGGT-3'      |
| MMP-9         | 5'-CGTCGTGATCCCCACTTACT-3'       | 5'-AACACACAGGGTTTGCCTTC-3'     |
| 18S RNA       | 5'-CATTCGAACGTCTGCCCTATC-3'      | 5'-CCTGTGCCTTCCTTGA-3'         |
